# Supplementary material for: Intra-skeletal variability in phosphate oxygen isotope composition reveals regional heterothermies in marine vertebrates
Source: Copernicus journal article supplement (doi:10.5194/bg-19-2671-2022), 2022-05-30
Supplement: Supplementary file 3 [file MS_Séon-et-al_Supp-material.pdf › MS_Séon-et-al_Supp-material.pdf]

## Supplementary materials

To

### **Intra-skeletal variability in phosphate oxygen isotope composition reveals regional heterothermies in marine vertebrates.**

Nicolas Séon<sup>1</sup>, Romain Amiot<sup>2</sup>, Guillaume Suan<sup>2</sup>, Christophe Lécuyer<sup>2,a</sup>, François Fourel<sup>3</sup>, Fabien Demaret<sup>4</sup>, Arnauld Vinçon-Laugier<sup>2</sup>, Sylvain Charbonnier<sup>1</sup> & Peggy Vincent<sup>1</sup>

<sup>1</sup> Centre de Recherche en Paléontologie - Paris (CR2P), CNRS, Muséum national d'Histoire naturelle, UPMC, Sorbonne Université, 57 rue Cuvier, 75231 Paris Cedex 05

<sup>2</sup> Univ Lyon, UCBL, ENSL, UJM, CNRS, LGL-TPE, F-69622, Villeurbanne, France.

<sup>3</sup> Laboratoire d'Ecologie des Hydrosystèmes Naturels et Anthropisés, CNRS UMR 5023, Université Claude Bernard Lyon 1, Villeurbanne, France

<sup>4</sup> Observatoire PELAGIS, UMS 3462 CNRS/Université de La Rochelle, Pôle Analytique, 5 allée de l'Océan, 17000 La Rochelle, France

<sup>a</sup> Also at Institut Universitaire de France

Corresponding author: Nicolas Séon, [nicolas.seon@edu.mnhn.fr](mailto:nicolas.seon@edu.mnhn.fr)

Supplementary information: 1

Supplementary figures: 2

Supplementary tables: 5 (cf. supplementary excel file)

**Supplementary information 1:****Information concerning the studied Mediterranean *Thunnus thynnus*.**

The Atlantic bluefin tuna was purchased from the ITM Intermarché fish shop located in Chatillon sur Chalaronne (01400, France). The specimen was fished on 02/18/2020 in the western Mediterranean Sea off the Spanish coast. The number assigned by the Ministerio de Agricultura, Pesca y Alimentacion of the Spanish government is: ESP 0209208.

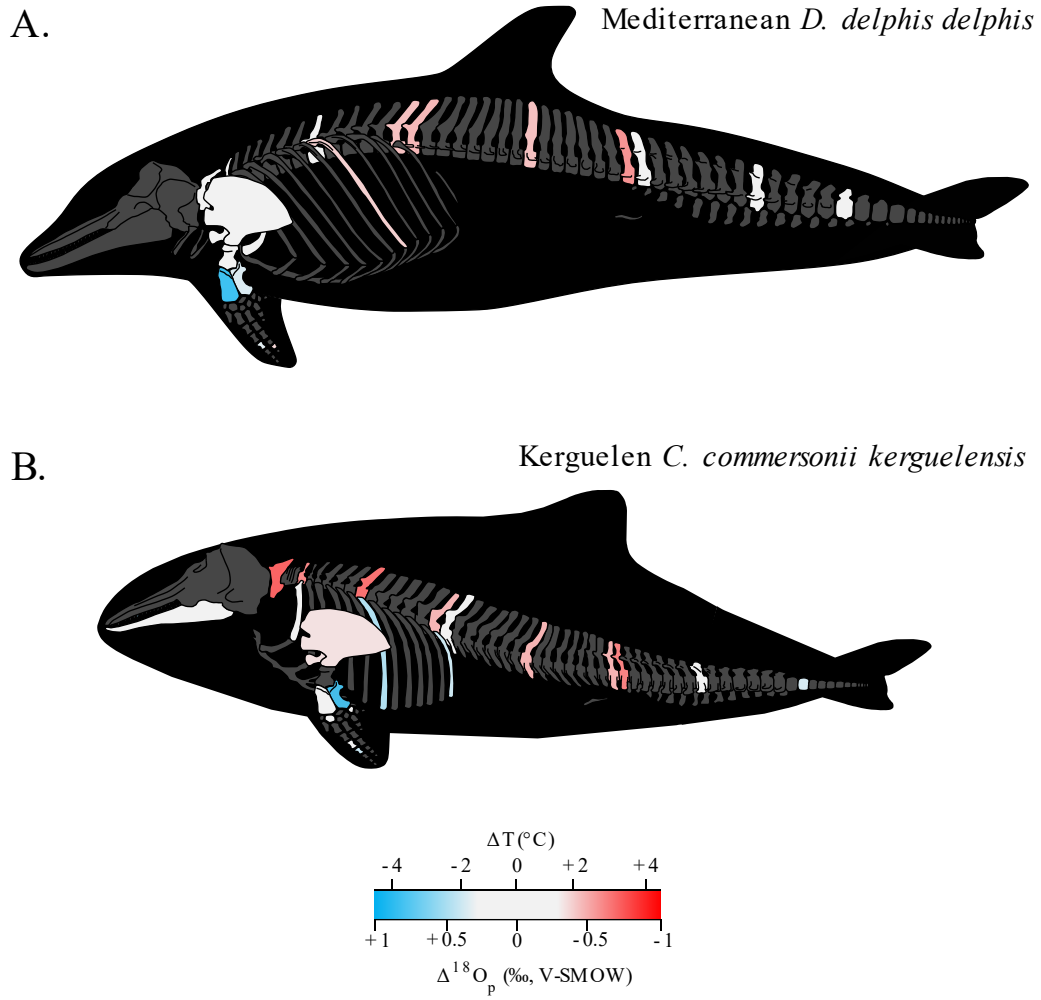

**Fig. S1.** Oxygen isotope variability within the skeleton of **A)** the Mediterranean *D. delphis delphis* (MNHN-ZC-AC-1876-275) and **B)** the *C. commersonii kerguelensis* from Kerguelen Islands (MNHN-ZC-AC-1983-058). Bone  $\Delta^{18}\text{O}_p$  correspond to the difference between bone  $\delta^{18}\text{O}_p$  value and an average value of the skeleton expressed as its mid-range value  $((\delta^{18}\text{O}_{\text{max}} - \delta^{18}\text{O}_{\text{min}})/2)$ . For paired skeletal elements as well as vertebrae centra and neural spines, the mean value is used.

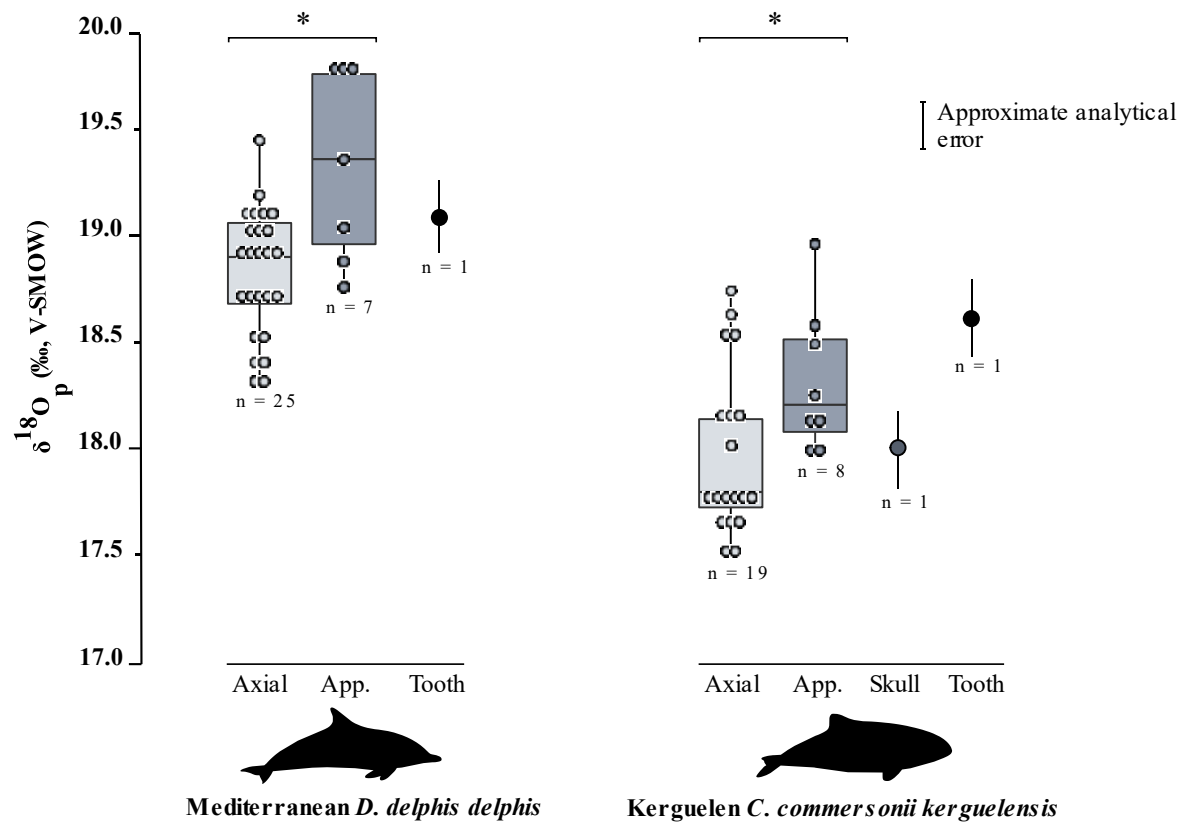

**Fig. S2.** Boxplots showing the  $\delta^{18}\text{O}_p$  values of skeletal regions for Mediterranean *D. delphis delphis* (MNHN-ZC-AC-1876-275) and Kerguelen *C. commersonii kerguelensis* (MNHN-ZC-AC-1983-058). Asterisks indicate the significance of the observed differences between pairs of groups: \* for  $p < 0.05$ . Outliers are plotted as small black circles. **Abbreviation= App.:** appendicular skeleton.
