# Supplementary material for: Intra-skeletal variability in phosphate oxygen isotope composition reveals regional heterothermies in marine vertebrates
Source: Copernicus journal article supplement (doi:10.5194/bg-19-2671-2022), 2022-05-30
Supplement: Supplementary file [file bg-19-2671-2022-supplement-title-page.pdf › bg-19-2671-2022-supplement-title-page.pdf]

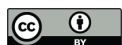

*Supplement of*

**Intra-skeletal variability in phosphate oxygen isotope composition reveals regional heterothermies in marine vertebrates**

**Nicolas Séon et al.**

*Correspondence to:* Nicolas Séon ([nicolas.seon@edu.mnhn.fr](mailto:nicolas.seon@edu.mnhn.fr))

- [bg-19-2671-2022-supplement-title-page.pdf](#)
- [FigS1.pdf](#)
- [FigS2.pdf](#)
- [MS\\_Séon-et-al\\_Supp-material.pdf](#)
- [Supplementary-tables.xlsx](#)

The copyright of individual parts of the supplement might differ from the article licence.
