# Supplementary figures and images for: Intra-skeletal variability in phosphate oxygen isotope composition reveals regional heterothermies in marine vertebrates
Source: Copernicus journal article supplement (doi:10.5194/bg-19-2671-2022), 2022-05-30

A.

Mediterranean *D. delphis delphis*

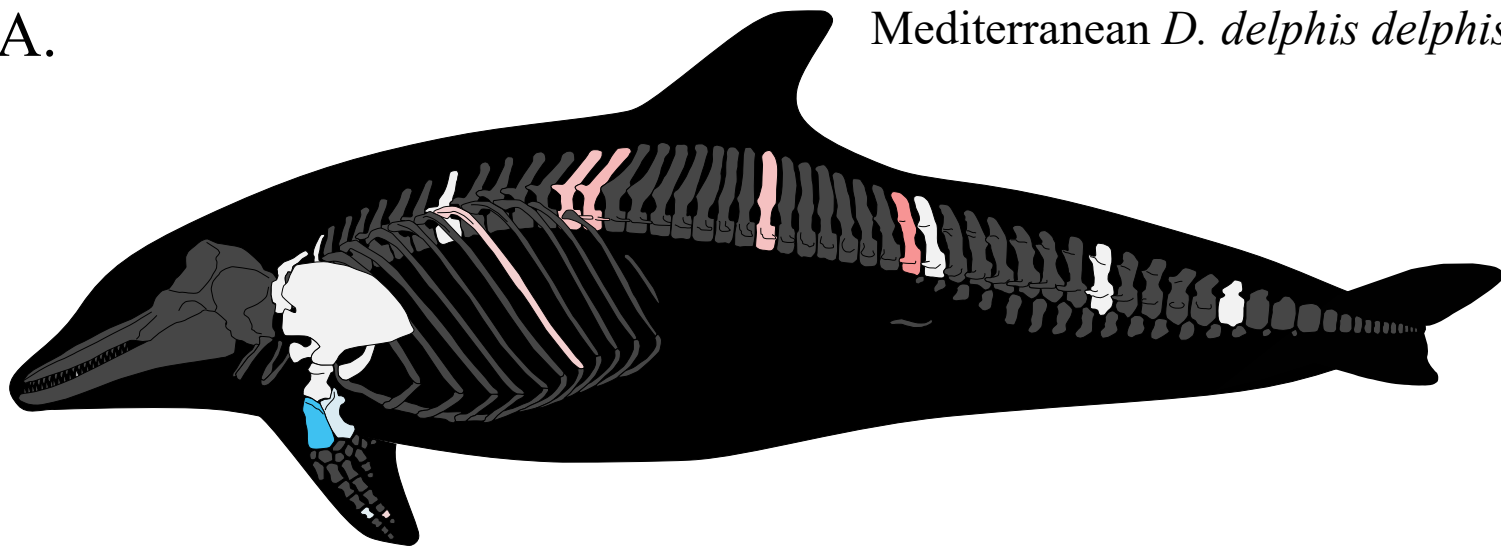

B.

Kerguelen *C. commersonii kerguelensis*

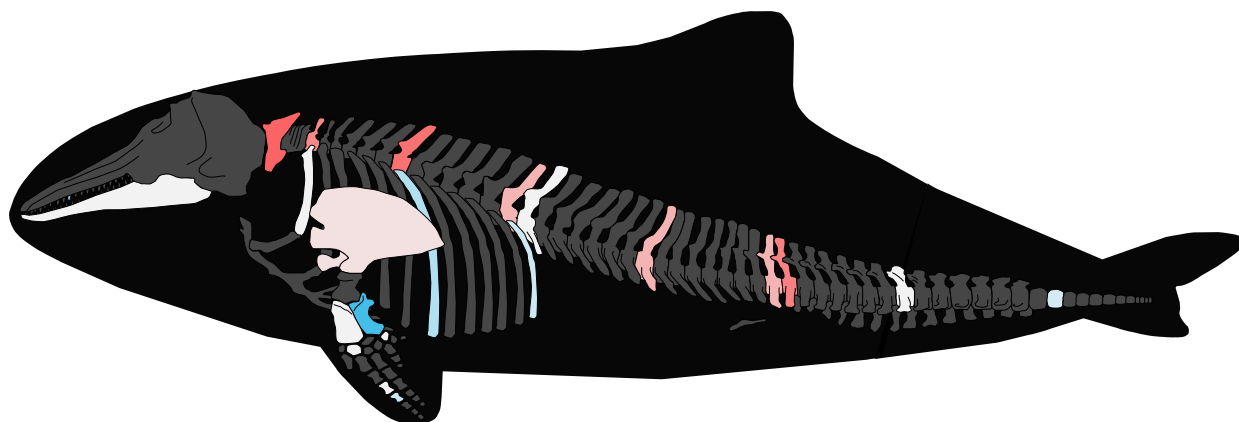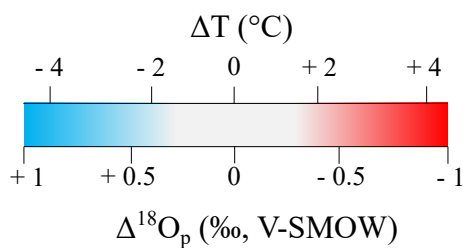

Supplement: Supplementary file 1 [file FigS1.pdf › FigS1.pdf]

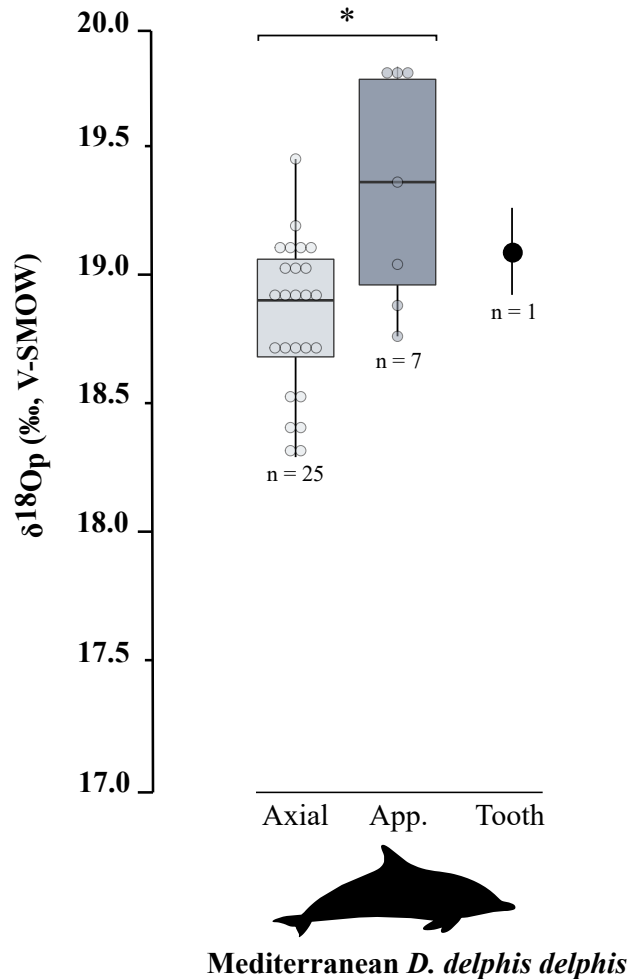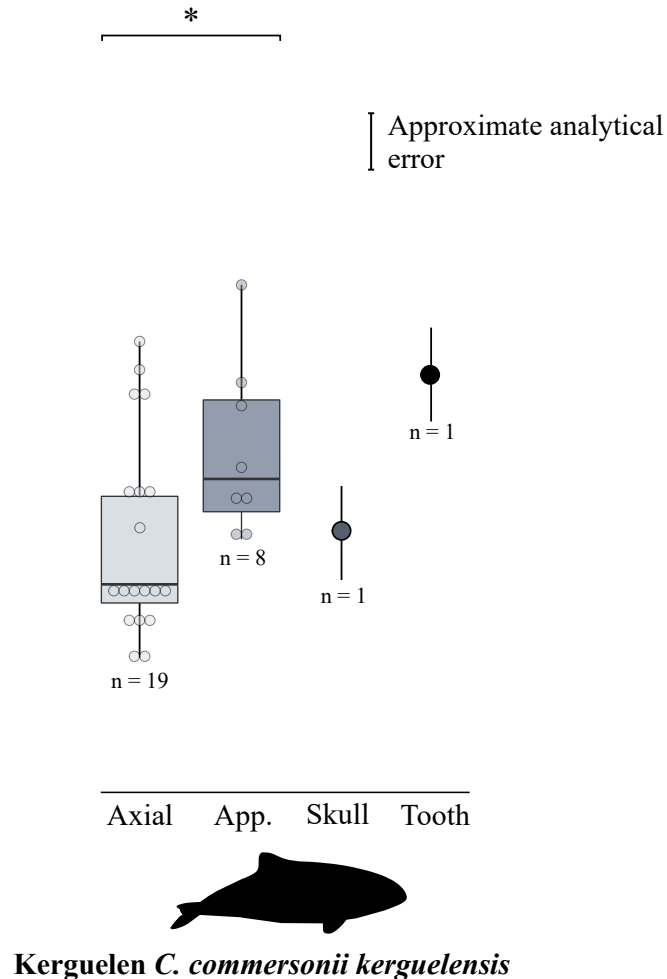

Supplement: Supplementary file 2 [file FigS2.pdf › FigS2.pdf]
